# Supplementary material
Source: PubMed Central journal article supplement (PMC3957847)
Supplement: AAC.02111-13_zac003142637so1.pdf [file AAC.02111-13_zac003142637so1.pdf]

## Supplemental material

### Contents:

Table S1: Plasmids and strains used in this study

Table S2: Primers used in this study

Supplemental text: Detailed description of the proteomic analysis

Methods

Results

Discussion

Table S3: Summary of differentially produced proteins after bacitracin stress in *E. faecalis* V583

Table S4: Analysis of differentially produced proteins from 2D-PAGE of bacitracin-stressed and unstressed samples

Figure S1: Proteomic analysis of the bacitracin stress response of *E. faecalis* V583.

References

**TABLE S1** Plasmids and strains used in this study

| Name                      | Description <sup>a</sup>                                                                                                                                                 | Source            |
|---------------------------|--------------------------------------------------------------------------------------------------------------------------------------------------------------------------|-------------------|
| <b>Vectors</b>            |                                                                                                                                                                          |                   |
| pLT06                     | Vector for unmarked gene deletions in <i>E. faecalis</i> ; cm <sup>r</sup>                                                                                               | (1)               |
| pTCV- <i>lac</i>          | <i>E. coli</i> -Gram positive shuttle vector for transcriptional fusions to <i>lacZ</i> ; erm <sup>r</sup> , kan <sup>r</sup>                                            | (2)               |
| pAT28                     | <i>E. coli</i> -Gram positive shuttle vector; spc <sup>r</sup>                                                                                                           | (3)               |
| pAH328                    | Vector for transcriptional promoter fusions to <i>luxABCDE</i> (luciferase) in <i>B. subtilis</i> ; integrates in <i>sacA</i> ; cm <sup>r</sup>                          | (4)               |
| pBS2E                     | Empty vector for <i>B. subtilis</i> for cloning in the BioBrick standard; integrates in <i>lacA</i> ; mls <sup>r</sup>                                                   | (5)               |
| pXT                       | Vector for xylose-inducible gene expression in <i>B. subtilis</i> ; integrates in <i>thrC</i> ; spc <sup>r</sup>                                                         | (6)               |
| pSB1A3                    | <i>E. coli</i> vector for cloning in the BioBrick standard; amp <sup>r</sup>                                                                                             | RSBP <sup>b</sup> |
| <b>Plasmids</b>           |                                                                                                                                                                          |                   |
| pAT2050-49                | pAT28 containing the EF2050-2049 operon with its native promoter region                                                                                                  | This study        |
| pLT0927                   | pLT06 containing the deletion construct for EF0927                                                                                                                       | This study        |
| pLT2050-49                | pLT06 containing the deletion construct for EF2050-2049                                                                                                                  | This study        |
| pLT2752-51                | pLT06 containing the deletion construct for EF2752-2751                                                                                                                  | This study        |
| pTCV56                    | pTCVlac containing a transcriptional P <sub>EF2050</sub> - <i>lacZ</i> fusion from -113 to +52 relative to the start codon                                               | This study        |
| pTCV57                    | pTCVlac containing a transcriptional P <sub>EF2050</sub> - <i>lacZ</i> fusion from -87 to +52 relative to the start codon                                                | This study        |
| pTCV58                    | pTCVlac containing a transcriptional P <sub>EF2050</sub> - <i>lacZ</i> fusion from -77 to +52 relative to the start codon                                                | This study        |
| pTCV59                    | pTCVlac containing a transcriptional P <sub>EF2752</sub> - <i>lacZ</i> fusion from -106 to +49 relative to the start codon                                               | This study        |
| pTCV60                    | pTCVlac containing a transcriptional P <sub>EF2752</sub> - <i>lacZ</i> fusion from -67 to +49 relative to the start codon                                                | This study        |
| pTCV0926                  | pTCVlac containing a transcriptional P <sub>EF0926</sub> - <i>lacZ</i> fusion from -233 to +59 relative to the start codon                                               | This study        |
| pCF129                    | pXT containing the EF2752-2751 operon                                                                                                                                    | This study        |
| pCF130                    | pXT containing the EF2050-2049 operon                                                                                                                                    | This study        |
| pCF134                    | pAH328 containing a transcriptional P <sub>EF2050</sub> - <i>luxABCDE</i> fusion from -190 to +94 relative to the start codon                                            | This study        |
| pCF135                    | pAH328 containing a transcriptional P <sub>EF2752</sub> - <i>luxABCDE</i> fusion from -180 to +51 relative to the start codon                                            | This study        |
| pCF143                    | pSB1A3 containing the EF0926-0927 operon in the BioBrick format                                                                                                          | This study        |
| pCF144                    | pSB1A3 containing <i>B. subtilis</i> P <sub>bceR</sub> region from -287 to -29 relative to the start codon in the BioBrick format                                        | This study        |
| pCF145                    | pBS2E containing the EF0926-0927 operon under control of <i>B. subtilis</i> P <sub>bceR</sub>                                                                            | This study        |
| pSG704                    | pXT containing <i>B. subtilis</i> <i>bceAB</i>                                                                                                                           | (7)               |
| <b><i>E. coli</i></b>     |                                                                                                                                                                          |                   |
| DH5α                      | <i>supE44 ΔlacU169(Φ80lacZΔM15) hsdR17 recA1 endA1 gyrA96 thi-1 relA1</i>                                                                                                | (8)               |
| MC1061                    | F <sup>-</sup> Δ( <i>ara-leu</i> )7697 [ <i>araD139</i> ] <sub>B/r</sub> Δ( <i>codB-lacI</i> )3 <i>galK16 galE15 λ<sup>-</sup> e14<sup>r</sup></i>                       | (9)               |
| XL1-Blue                  | <i>mcrA0 relA1 rpsL150(strR) spoT1 mcrB1 hsdR2(r<sup>m</sup>) recA1 endA1 gyrA96 thi-1 hsdR17 supE44 relA1 lac F<sup>'</sup>::Tn10 proAB lacI<sup>q</sup> Δ(lacZ)M15</i> | Stratagene        |
| <b><i>E. faecalis</i></b> |                                                                                                                                                                          |                   |
| JH2-2                     | Laboratory strain, plasmid-free; rif <sup>r</sup> , fs <sup>r</sup>                                                                                                      | (10)              |
| V583                      | Sequenced clinical strain containing plasmids pTEF1, pTEF2, pTEF3; van <sup>r</sup>                                                                                      | (11)              |
| Δ0927                     | JH2-2 carrying an unmarked deletion of EF0927                                                                                                                            | This study        |
| Δ2050-49                  | JH2-2 carrying an unmarked deletion of the EF2050-2049 operon                                                                                                            | This study        |
| Δ2752-51                  | JH2-2 carrying an unmarked deletion of the EF2752-2751 operon                                                                                                            | This study        |
| Δ2050-49 Δ2752-51         | JH2-2 carrying unmarked deletions of the EF2050-2049 and EF2752-51 operons                                                                                               | This study        |
| DLEf01                    | JH2-2 carrying pTCV56; kan <sup>r</sup>                                                                                                                                  | This study        |
| DLEf02                    | JH2-2 carrying pTCV 57; kan <sup>r</sup>                                                                                                                                 | This study        |
| DLEf03                    | JH2-2 carrying pTCV 58; kan <sup>r</sup>                                                                                                                                 | This study        |
| DLEf04                    | JH2-2 carrying pTCV 59; kan <sup>r</sup>                                                                                                                                 | This study        |
| DLEf05                    | JH2-2 carrying pTCV 60; kan <sup>r</sup>                                                                                                                                 | This study        |

|                    |                                                                                                                               |                       |
|--------------------|-------------------------------------------------------------------------------------------------------------------------------|-----------------------|
| DLEf06             | JH2-2 carrying pTCV0926; kan <sup>r</sup>                                                                                     | This study            |
| DLEf07             | Δ0927 carrying pTCV56; kan <sup>r</sup>                                                                                       | This study            |
| DLEf08             | Δ0927 carrying pTCV59; kan <sup>r</sup>                                                                                       | This study            |
| DLEf09             | Δ0927 carrying pTCV0926; kan <sup>r</sup>                                                                                     | This study            |
| DLEf10             | Δ2050-49 carrying pTCV56; kan <sup>r</sup>                                                                                    | This study            |
| DLEf11             | Δ2050-49 carrying pTCV59; kan <sup>r</sup>                                                                                    | This study            |
| DLEf12             | Δ2050-49 carrying pTCV0926; kan <sup>r</sup>                                                                                  | This study            |
| DLEf13             | Δ2752-51 carrying pTCV56; kan <sup>r</sup>                                                                                    | This study            |
| DLEf14             | Δ2752-51 carrying pTCV59; kan <sup>r</sup>                                                                                    | This study            |
| DLEf15             | Δ2752-51 carrying pTCV0926; kan <sup>r</sup>                                                                                  | This study            |
| DLEf16             | Δ2050-49 carrying pAT2050-49; spc <sup>r</sup>                                                                                | This study            |
| <i>B. subtilis</i> |                                                                                                                               |                       |
| W168               | Wild-type, <i>trpC2</i>                                                                                                       | Laboratory stock      |
| SGB220             | TMB1518 <i>lacA</i> ::pCF145 <i>sacA</i> ::pCF134; cm <sup>r</sup> , mls <sup>r</sup>                                         | This study            |
| SGB221             | TMB1518 <i>lacA</i> ::pCF145 <i>sacA</i> ::pCF135; cm <sup>r</sup> , mls <sup>r</sup>                                         | This study            |
| SGB222             | TMB1518 <i>lacA</i> ::pCF145 <i>thrC</i> ::pCF129 <i>sacA</i> ::pCF134; cm <sup>r</sup> , mls <sup>r</sup> , spc <sup>r</sup> | This study            |
| SGB223             | TMB1518 <i>lacA</i> ::pCF145 <i>thrC</i> ::pCF129 <i>sacA</i> ::pCF135; cm <sup>r</sup> , mls <sup>r</sup> , spc <sup>r</sup> | This study            |
| SGB224             | TMB1518 <i>lacA</i> ::pCF145 <i>thrC</i> ::pCF130 <i>sacA</i> ::pCF134; cm <sup>r</sup> , mls <sup>r</sup> , spc <sup>r</sup> | This study            |
| SGB225             | TMB1518 <i>lacA</i> ::pCF145 <i>thrC</i> ::pCF130 <i>sacA</i> ::pCF135; cm <sup>r</sup> , mls <sup>r</sup> , spc <sup>r</sup> | This study            |
| SGB228             | TMB1518 <i>sacA</i> ::pCF134; cm <sup>r</sup>                                                                                 | This study            |
| SGB229             | TMB1518 <i>sacA</i> ::pCF135; cm <sup>r</sup>                                                                                 | This study            |
| SGB231             | TMB1518 <i>thrC</i> ::pCF129; spc <sup>r</sup>                                                                                | This study            |
| SGB233             | TMB1518 <i>thrC</i> ::pCF130; spc <sup>r</sup>                                                                                | This study            |
| TMB1518            | W168 with unmarked deletions of the <i>bceRS-bceAB</i> , <i>psdRS-psdAB</i> , <i>yxdJK-yxdLM-yxeA</i> loci                    | Own unpublished study |
| TMB1555            | TMB1518 <i>thrC</i> :: pSG704; spc <sup>r</sup>                                                                               | This study            |

<sup>a</sup> Amp, ampicillin; cm, chloramphenicol; erm, erythromycin; fs, fusidic acid; kan, kanamycin; mls, macrolide-lincosamide-streptogramin B group; rif, rifampin; spc, spectinomycin; van, vancomycin; r, resistant

<sup>b</sup> RSBP, Registry of Standard Biological Parts (<http://parts.igem.org>)

**TABLE S2** Primers used in this study

| Primer name                                                | Sequence (5'-3') <sup>a</sup>                                                     | Use                           |
|------------------------------------------------------------|-----------------------------------------------------------------------------------|-------------------------------|
| Oligonucleotides for cloning <i>E. faecalis</i> constructs |                                                                                   |                               |
| DLEF_034                                                   | ATAGGATCCGTGGGATTGCATGGCTAAAATCAT                                                 | EF0927 deletion up fwd        |
| DLEF_035                                                   | gacctattTGTCTACTCCTATCTAGGGCACCATAT                                               | EF0927 deletion up rev        |
| DLEF_036                                                   | ggagtagacaAAAGTAGGTCTATCAGCAAATAAGAGG                                             | EF0927 deletion down fwd      |
| DLEF_037                                                   | CGCCTGCAGATACCCTAAAAGAATACCACCTA                                                  | EF0927 deletion down rev      |
| DLEF_017                                                   | AGTGGATCCTAGGAACGTTTTTACCAAC                                                      | EF2050-2049 deletion up fwd   |
| DLEF_031                                                   | ttttataattaatctAACATATTTTCCACTCCTATTCTTCTCACTC                                    | EF2050-2049 deletion up rev   |
| DLEF_030                                                   | gaaaatagtAGATTAATTATAAAAAATCGTTAAGCATGC                                           | EF2050-2049 deletion down fwd |
| DLEF_020                                                   | GGAAGTGCAGTAACATAAGAAAGTTTTTCT                                                    | EF2050-2049 deletion down rev |
| DLEF_022                                                   | GCCGGATCCATCAATTAACAGCAGTTT                                                       | EF2752-2751 deletion up fwd   |
| DLEF_032                                                   | tacagtttttaaTTTTCTCGCTCCAACGTTTTGTT                                               | EF2752-2751 deletion up rev   |
| DLEF_033                                                   | gagcgagaaaaTTAAAAACTGTAAAAGCCGTTGTGAA                                             | EF2752-2751 deletion down fwd |
| DLEF_025                                                   | CATCTGCAGTAATTCTTCCGCCGTA                                                         | EF2752-2751 deletion down rev |
| DLEF_056                                                   | GCATGAATTCTAAAAGAATAACAGTGCACCTTACAGTAA                                           | pTCV56 fwd                    |
| DLEF_057                                                   | GCACGAATTCTAATGTAAGTTCATTGTTATTCTTTTCTATTGTCG                                     | pTCV57 fwd                    |
| DLEF_058                                                   | TAATGGAATTCCATTGTTATTCTTTTCTATTGTCGTTTTTTTC                                       | pTCV58 fwd                    |
| DLEF_008                                                   | TTAAGGATCCATATTTAATTTTCGTTTCCGTAAAC                                               | P <sub>EF2050</sub> rev       |
| DLEF_059                                                   | TTCAGAATTTCGCCAATTATTCTTTGACTACCGAACGATAT                                         | pTCV59 fwd                    |
| DLEF_060                                                   | TGTGAATTCAAAACGATGTTTCATTCAGATTTTTTCTTGGTAAAA                                     | pTCV60 fwd                    |
| DLEF_010                                                   | TTATGGATCCAACGACCATATGCTTGCTGA                                                    | P <sub>EF2752</sub> rev       |
| DLEF_052                                                   | AAAAGAATTTCGTCATGCCAATTGTCGAAAAAGCTTCTATT                                         | pTCV0926 fwd                  |
| DLEF_053                                                   | TTTTGGATCCTCCTCGCTAATTAATTTCTCGAATGGTTGT                                          | pTCV0926 rev                  |
| DLEF_061                                                   | ATTTTGGATCCTTAATCTTTCACCTAAGTGATAAACTTTTTTGA                                      | pAT-2050-49 rev               |
| Oligonucleotides for 5'-RACE                               |                                                                                   |                               |
| DLEF_046                                                   | GTAACAAGCCCATCACATCCTTAGATGA                                                      | EF2050 5'-RACE-1              |
| DLEF_047                                                   | TGCTTGCCACCAGAAATTTCT                                                             | EF2050 5'-RACE-2              |
| DLEF_048                                                   | CATTACAGAGACTTTTTCTCCATCAAGTGTCATG                                                | EF2050 5'-RACE-3              |
| DLEF_049                                                   | ACAATTCTGTTGCTGATTTTGAATCCAG                                                      | EF2752 5'-RACE-1              |
| DLEF_050                                                   | CCCACAGATATCTCTGGTGGATAA                                                          | EF2752 5'-RACE-2              |
| DLEF_051                                                   | CTTCTAATGAAACTTTTTCTACAGCTAAAGGCAACAGAATATTGT                                     | EF2752 5'-RACE-3              |
| Oligonucleotides for cloning <i>B. subtilis</i> constructs |                                                                                   |                               |
| TM2445                                                     | AAATTGGATCCAATAACAAAACGTTGGAGCG                                                   | pCF129 fwd                    |
| TM2446                                                     | AAATTGAATTCTTCAACACGGCTTTTACAG                                                    | pCF129 rev                    |
| TM2447                                                     | AAATTGGATCCCGATACACTAAATGAGTGAG                                                   | pCF130 fwd                    |
| TM2448                                                     | AAATTGAATTCAAAATCGTTAAGCGTGCATG                                                   | pCF130 rev                    |
| TM2596                                                     | AAATTGAATTCGCCAAATTGCTAAAAGCAAC                                                   | pCF135 fwd                    |
| TM2597                                                     | AAATTACTAGTTAAACGACCATATGTCTTGC                                                   | pCF135 rev                    |
| TM2598                                                     | AAATTGAATTCCTCGTTGCGTAGAATATTTCAG                                                 | pCF134 fwd                    |
| TM2599                                                     | AAATTACTAGTAAATTCACCATCTTGGACAG<br>AAATTGAATTCGCGGCCGCTCTAGAAAGGAGGtgGCCGGCATGGCT | pCF134 rev<br>pCF143 fwd      |
| TM2600                                                     | AAAATCATGATTGTGCGAAG                                                              |                               |
| TM2601                                                     | AAATTACTAGTATTAACCGGTTTTCACTTCATTATAATAACTGAGGG                                   | pCF143 rev                    |
| TM2610                                                     | AATTGAATTCGCGGCCGCTTCTAGAGTCCGATGATTCTTGC GGCC                                    | pCF144 fwd                    |
| TM2611                                                     | AATTACTAGTACAAGTGTATAGCAAAACGCC                                                   | pCF144 rev                    |

<sup>a</sup> Restriction sites are underlined; overlaps to other primers for PCR fusions are shown by lower case letters; the optimised Shine-Dalgarno sequence and start and stop codons for the EF0926-0927 BioBrick are in bold

## Supplemental Text: Detailed description of the proteomic analysis

### Methods

For proteomic analyses, exponentially growing cultures ( $OD_{600} = 0.4$ ) of *E. faecalis* V583 in BHI medium were exposed to  $64 \mu\text{g ml}^{-1}$  bacitracin for 1 h. Control cells were treated with an equal volume of sterile water. Cells were harvested by centrifugation, washed twice with 10 mM Tris/HCl (pH 7) and stored at  $-80^{\circ}\text{C}$ .

For protein extraction, cells from 0.4 L culture volume were resuspended in 5 ml lysis buffer (20 mM Tris, 7.4 M urea, 2 M thiourea, 3 % CHAPS, 1 % Brij-35, 1 mM PMSF, 40 mM DTT, 5 mM TBP, 0.5 % (v/v) carrier ampholyte 3-10 (Invitrogen)). Cells were disrupted by four passages through a French pressure cell at 20,000 psi, followed by six 15 s cycles of sonication (Vibra-Cell SONICS) at 20 % amplitude. The soluble fraction was isolated by centrifugation for 5 min at  $25,900 \times g$ , followed by 45 min at  $186,000 \times g$ , and stored at  $-80^{\circ}\text{C}$ . Protein concentrations were determined with a 2-D Quant kit (GE Healthcare), and 300  $\mu\text{g}$  of protein were then treated with the 2-D Clean up kit (GE Healthcare) according to the manufacturer's instructions.

For isoelectric focussing, samples were mixed with rehydration buffer (7 M urea, 2 M thiourea, 2 % CHAPS, 1 % Brij-35, 50 mM DTT, 4 mM TCEP, 0.5 % (v/v) carrier ampholytes pH 3-10 (Invitrogen), 5 mM TBP; total loading volume 315  $\mu\text{l}$ ) and loaded onto an 18 cm pH 4-7 ReadyStrip<sup>TM</sup> IPG strip (Bio-Rad) by passive rehydration for 16 hours at room temperature. Subsequently, isoelectric focussing was performed with an IPGphor Isoelectric Focussing unit (GE Healthcare) using a step-wise protocol of 2 h at 200 V, 3 h at 500 V, 4 h at 1000 V, 3 h at 2000 V, 6 h at 4000 V and 7 h at 8000 V.

IPG strips were incubated for 10 min in 1.7 ml reduction solution (6 M urea, 130 mM DTT, 375 mM Tris-HCl, pH 8.8, 0.1 % (w/v) SDS, 20% glycerol, 2% (v/v) saturated bromophenol blue solution), followed by 10 min in 1.7 ml alkylation solution (same as reduction solution but containing 135 mM iodoacetamide instead of DTT). Second dimension SDS-PAGE was carried out using 12.5 % acrylamide gels in the Laemmli buffer system (12) and using an Ettan<sup>TM</sup> DALTsix Electrophoresis System (GE Healthcare) according to the manufacturer's instructions.

Gels were fixed twice in 10% methanol, 7% acetic acid for 30 min, stained overnight with SYPRO-ruby (Invitrogen) and destained twice in distilled water for 30 min. Image acquisition was carried out using a Molecular Imager FX (Bio-Rad) at a resolution of 100 microns, and image analysis was performed using the PDQuest 2-D analysis software (Bio-Rad) according to the manufacturer's recommendations. Spots of significantly different intensity, based on two-tailed paired t-test analysis, were excised subsequently from colloidal Coomassie-stained gels (13), digested in-gel with trypsin and peptides identified using a 4800 MALDI TOF/TOF Analyzer (Applied Biosystems). The acquired spectra from the MALDI-TOF/TOF were analysed with MASCOT (Matrix Science) against the NCBIInr database. MASCOT matches were only accepted with a probability score of  $p < 0.05$ . Proteins with one peptide matched were manually confirmed by the Centre for Protein Research, University of Otago.

## Results

To investigate the response of *E. faecalis* to bacitracin, we analysed the proteome of strain V583, whose genome has been fully sequenced, after 1 h exposure to 64  $\mu\text{g ml}^{-1}$  bacitracin, which corresponded to the strain's minimal inhibitory concentration (MIC), compared to an untreated control. A summary of the differentially produced proteins is given in Table 1; the 2D-gels and detailed analysis of protein spots are available as supplementary files Figure S1 and Table S3, respectively. As expected, a number of proteins involved in cell wall metabolism were found in increased quantities after bacitracin stress. These included enzymes involved in rhamnose biosynthesis (EF2191, EF2192, EF2193), a major component of polysaccharides in the enterococcal cell wall (14). Furthermore, increased production was observed for EF2172, proposed to be involved in isoprenoid biosynthesis, which is required for production of the lipid carrier molecule undecaprenyl-(pyro)phosphate (15), the cellular target of bacitracin (16). Additionally, several enzymes for energy metabolism (pyruvate dehydrogenase, 6-phosphofructokinase, glyceraldehyde-3-phosphate dehydrogenase) were found up-regulated, while protein synthesis (ribosomal proteins S6, L31 and L7/L12) appeared down-regulated, indicating metabolic re-arrangements in response to bacitracin. This is also seen for fatty acid metabolism with up-regulation of one isoform of 3-oxoacyl-ACP synthase (FabF-1) and down-regulation of another (FabF-2). Further proteins with increased production after bacitracin exposure likely indicated a general response to stress, including enzymes involved in nucleotide salvage (EF0264, EF2549, EF2694) and correction of protein misfolding (EF0266, EF0771, EF1647).

While most of the proteins discussed above showed changes in the range of two- to six-fold, only three spots displayed larger changes. The strongest response, over 50-fold, was observed for the hypothetical protein encoded by EF1753. This protein contains the domain COG3595 and is thus similar to YvIB of *B. subtilis*. While the cellular role of YvIB is still unknown, its gene is part of the cell wall stress stimulon of *B. subtilis*, which is induced, for example, by bacitracin (17, 18). It therefore appears likely that YvIB and EF1753 share a similar function. The second most highly regulated protein was EF2586, annotated as encoding cobyrinic acid synthase. These enzymes are involved in vitamin B12 biosynthesis (19), but the reason for its strong response to bacitracin is unclear. The third strongest effect was observed for EF2050. This protein is the ATPase component of a BceAB-like ABC-transporter (EF2050-2049), which have to date only been identified in the context of resistance against peptide antibiotics (20, 21). As mentioned above, two such transporters had been previously identified in the genome of *E. faecalis* by a comparative genomics study, namely EF2050-2049 and EF2752-2751 (20). Although our proteomic study only identified the former transporter, both loci were found to be up-regulated in response to bacitracin by transcriptome analysis (22). We therefore decided to investigate these two transporters in more detail, both regarding their role in bacitracin resistance and their regulation.

## Discussion

Our proteomic analysis of bacitracin-exposed *E. faecalis* showed that the bacterium responds to the antibiotic with a specific reaction to the bacitracin-induced cell wall damage, as well as with a more general response to stress or growth inhibition. Cell wall damage is counteracted

for example by increased synthesis of cell wall polysaccharides as seen by the up-regulation of the rhamnase biosynthetic pathway. Changes in the cell surface have been implicated in resistance against antimicrobial peptides, either by altering the surface charge or decreasing access of the peptide to its cellular target (23, 24), consistent with our findings. One well-characterized example for such cell wall modifications is the D-alanylation of teichoic acids, catalyzed by the Dlt-system (25, 26), which reduces the net negative charge of the cell surface and thus the affinity of the primarily cationic peptides. While the entire *dltABCD*-operon of *E. faecalis* OG1RF (EF2750-EF2746) was found up-regulated in response to bacitracin and vancomycin by transcriptome analysis (22), none of the corresponding proteins was identified in our proteomic approach. This may be due to the membrane-localization of at least two of the Dlt-proteins (27), which would have excluded them from the 2D-PAGE analysis.

Most of the proteins with differential production after bacitracin stress had metabolic functions and thus are more likely to represent a general response to stress rather than a specific reaction to bacitracin. Abranches and colleagues reported an apparent metabolic down-shift after bacitracin-stress, as deduced from their transcriptome study (22). However, our data seem more consistent with metabolic re-arrangements. In good agreement with the previous study, we also observed a decrease in protein synthesis exemplified by the down-regulation of several ribosomal proteins. In contrast, a number of enzymes of energy metabolism, particularly of glycolysis, were found up-regulated in our study, possibly reflecting an increased demand for energy to combat the stress condition. It is not reasonable to expect identical results from transcriptomic and proteomic analyses of the same condition, because transcriptomics cannot detect post-transcriptional regulation, while proteome analyses exclude hydrophobic proteins or others that are insoluble under assay conditions. With this in mind, our data are overall consistent with those reported previously, and together these two datasets provide a useful overview of the response of *E. faecalis* to inhibitors of cell wall synthesis such as bacitracin.

**TABLE S3** Summary of differentially produced proteins after bacitracin stress in *E. faecalis* V583

| Locus tag               | Gene          | Spot <sup>a</sup> | Annotation                                                | x-fold change <sup>a,b</sup> | p-value         |
|-------------------------|---------------|-------------------|-----------------------------------------------------------|------------------------------|-----------------|
| Up-regulated proteins   |               |                   |                                                           |                              |                 |
| EF0233                  | <i>rpoA</i>   | 24                | DNA-directed RNA polymerase subunit alpha                 | 2.3                          | 0.044           |
| EF0264                  | <i>hpt</i>    | 35                | Hypoxanthine-guanine phosphoribosyltransferase            | 5.7                          | 0.027           |
| EF0266                  |               | 47                | Chaperonin, 33 kDa                                        | 2.2                          | 0.039           |
| EF0283                  | <i>fabF-1</i> | 30                | 3-oxoacyl-ACP synthase                                    | 2.6                          | 0.061           |
| EF0445                  | <i>menB</i>   | 40                | Naphthoate synthase                                       | 5.3                          | <0.001          |
| EF0771                  | <i>clpP</i>   | 31                | ATP-dependent Clp protease proteolytic subunit            | 2.9                          | <0.001          |
| EF0912                  |               | 19                | Peptide ABC transporter ATP-binding protein               | 2.6                          | 0.024           |
| EF1045                  | <i>pfk</i>    | 21                | 6-phosphofructokinase                                     | 2.2                          | 0.067           |
| EF1142                  |               | 48                | HAD superfamily hydrolase                                 | 2.1                          | 0.05            |
| EF1353                  | <i>pdhA</i>   | 18                | Pyruvate dehydrogenase complex E1 component subunit alpha | 1.9                          | 0.022           |
|                         | <i>pdhB</i>   | 22                | Pyruvate dehydrogenase complex, E1 component subunit beta | 2.4                          | 0.014           |
| EF1354                  |               |                   |                                                           |                              |                 |
| EF1356                  | <i>lpdA</i>   | 26                | Dihydrolipoamide dehydrogenase                            | 2.1                          | 0.015           |
| EF1402                  |               | 49                | Hypothetical protein                                      | 2.5                          | 0.022           |
| EF1586                  | <i>nox</i>    | 23                | NADH oxidase                                              | 1.9                          | 0.023           |
| EF1647                  | <i>hslV</i>   | 41                | ATP-dependent protease peptidase subunit                  | 6.9                          | 0.007           |
| EF1746                  | <i>galU</i>   | 27                | UTP-glucose-1-phosphate uridylyltransferase               | 2.8                          | 0.1             |
| EF1753                  |               | 42/44             | Hypothetical protein (COG3595)                            | 55.9/33.3                    | 0.019/<br>0.002 |
|                         | <i>gap-2</i>  | 16/17             | Glyceraldehyde-3-phosphate dehydrogenase                  | 2.4/1.8                      | 0.099/<br>0.106 |
| EF1964                  |               |                   |                                                           |                              |                 |
| EF2050                  |               | 43                | ABC transporter ATP-binding protein                       | 9.6                          | 0.001           |
| EF2172                  | <i>ispD</i>   | 15                | 2-C-methyl-D-erythritol 4-phosphate cytidylyltransferase  | 1.9                          | 0.022           |
| EF2191                  |               | 38                | dTDP-4-dehydrorhamnose reductase                          | 6.0                          | 0.001           |
| EF2192                  | <i>rfbB</i>   | 20                | dTDP-glucose 4,6-dehydratase                              | 2.5                          | 0.067           |
| EF2193                  | <i>rfbC</i>   | 37                | dTDP-4-dehydrorhamnose 3,5-epimerase                      | 5.4                          | 0.032           |
| EF2421                  | <i>thrC</i>   | 50                | Threonine synthase                                        | 2.6                          | 0.019           |
| EF2432                  |               | 51                | Metallo-beta-lactamase superfamily protein                | 3.6                          | 0.016           |
| EF2549                  | <i>upp</i>    | 36                | Uracil phosphoribosyltransferase                          | 3.3                          | 0.029           |
| EF2586                  |               | 52                | Cobyric acid synthase                                     | 15.2                         | 0.017           |
| EF2694                  | <i>pfs</i>    | 33                | MTA/SAH nucleosidase                                      | 5.1                          | 0.053           |
| EF2729                  | <i>nusG</i>   | 29                | Transcription antitermination protein                     | 2.9                          | 0.02            |
| EF2879                  | <i>accB</i>   | 28                | Acetyl-CoA carboxylase                                    | 2.2                          | <0.001          |
| EF2954                  |               | 53                | Cro/CI family transcriptional regulator                   | 4.0                          | 0.019           |
| Down-regulated proteins |               |                   |                                                           |                              |                 |
| EF0007                  | <i>rpsF</i>   | 5                 | 30S ribosomal protein S6                                  | 0.3                          | 0.018           |
| EF0185                  | <i>deoB</i>   | 9                 | Phosphopentomutase                                        | 0.4                          | 0.09            |
| EF0709                  | <i>ptsH</i>   | 6                 | Phosphocarrier protein HPr                                | 0.3                          | 0.028           |
| EF0760                  |               | 12                | Amino acid ABC transporter ATP-binding protein            | 0.6                          | 0.058           |
| EF1171                  | <i>rpmE</i>   | 7                 | 50S ribosomal protein L31                                 | 0.3                          | 0.053           |
| EF2556                  |               | 4                 | Fumarate reductase flavoprotein subunit                   | 0.1                          | 0.076           |
| EF2715                  | <i>rplL</i>   | 8                 | 50S ribosomal protein L7/L12                              | 0.2                          | 0.082           |
| EF2880                  | <i>fabF-2</i> | 14                | 3-oxoacyl-ACP synthase                                    | 0.6                          | 0.034           |
| EF2923                  |               | 2                 | Hypothetical protein EF2923                               | 0.2                          | 0.012           |
| EF3118                  | <i>rpe</i>    | 10                | Ribulose-phosphate 3-epimerase                            | 0.5                          | 0.033           |
| EF3256                  |               | 13                | Pheromone cAD1 lipoprotein                                | 0.6                          | 0.09            |

<sup>a</sup> Spot numbers refer to the markings in supplementary Figure S1; where a single protein was identified in two spots, both spot numbers and both induction values are given.

<sup>b</sup> Represents the x-fold change in spot intensity in the bacitracin-stressed samples relative to the control; details on quantification and statistical analyses are given in Table S3.



**TABLE S4** Analysis of differentially produced proteins from 2D-PAGE of bacitracin-stressed and unstressed samples

| PDQuest and Excel analysis |                                            |                                                      |                      |                            | MALDI-TOF/TOF (MS/MS) and MASCOT analysis                 |                           |              |                                         |              |               |  |
|----------------------------|--------------------------------------------|------------------------------------------------------|----------------------|----------------------------|-----------------------------------------------------------|---------------------------|--------------|-----------------------------------------|--------------|---------------|--|
| Spot number <sup>a</sup>   | Average control spot quantity <sup>b</sup> | Average bacitracin stress spot quantity <sup>c</sup> | p value <sup>d</sup> | x-fold change <sup>e</sup> | Protein identified                                        | Accession number (MASCOT) | MASCOT Score | Number of peptides matched <sup>f</sup> | Nominal mass | Calculated pI |  |
| Up-regulated proteins      |                                            |                                                      |                      |                            |                                                           |                           |              |                                         |              |               |  |
| 15                         | 695.2                                      | 1346.3                                               | 0.022                | 1.9                        | 2-C-methyl-D-erythritol 4-phosphate cytidyltransferase    | gi 29376680               | 248          | 3                                       | 26847        | 5.4           |  |
| 16                         | 1187.8                                     | 2826.5                                               | 0.099                | 2.4                        | Glyceraldehyde-3-phosphate dehydrogenase                  | gi 29376486               | 670          | 5                                       | 35749        | 5.0           |  |
| 17                         | 9399.2                                     | 16682.9                                              | 0.106                | 1.8                        | Glyceraldehyde-3-phosphate dehydrogenase                  | gi 29376486               | 1086         | 9                                       | 35749        | 5.0           |  |
| 18                         | 1707.8                                     | 3315.0                                               | 0.022                | 1.9                        | Pyruvate dehydrogenase complex E1 component subunit alpha | gi 29375920               | 664          | 6                                       | 41358        | 5.3           |  |
| 19                         | 1005.9                                     | 2606.3                                               | 0.024                | 2.6                        | Peptide ABC transporter ATP-binding protein               | gi 29375496               | 643          | 6                                       | 35768        | 5.9           |  |
| 20                         | 1412.6                                     | 3572.0                                               | 0.067                | 2.5                        | dTDP-glucose 4,6-dehydratase                              | gi 29376700               | 962          | 9                                       | 38315        | 4.9           |  |
| 21                         | 2314.6                                     | 5126.0                                               | 0.067                | 2.2                        | 6-phosphofructokinase                                     | gi 29375624               | 596          | 6                                       | 34391        | 5.6           |  |
| 22                         | 1147.3                                     | 2796.8                                               | 0.014                | 2.4                        | Pyruvate dehydrogenase complex, E1 component subunit beta | gi 29375921               | 806          | 8                                       | 35373        | 4.7           |  |
| 23                         | 978.8                                      | 1873.5                                               | 0.023                | 1.9                        | NADH oxidase                                              | gi 29376148               | 862          | 8                                       | 48884        | 4.8           |  |
| 24                         | 908.4                                      | 2078.5                                               | 0.044                | 2.3                        | DNA-directed RNA polymerase subunit alpha                 | gi 29374877               | 457          | 4                                       | 35028        | 4.9           |  |
| 26                         | 865.7                                      | 1779.5                                               | 0.015                | 2.1                        | Dihydrolipoamide dehydrogenase                            | gi 29375923               | 916          | 6                                       | 49113        | 4.9           |  |
| 27                         | 840.4                                      | 2392.8                                               | 0.100                | 2.8                        | UTP-glucose-1-phosphate uridylyltransferase               | gi 29376295               | 641          | 7                                       | 33460        | 5.4           |  |
| 28                         | 976.7                                      | 2111.1                                               | <0.001               | 2.2                        | Acetyl-CoA carboxylase                                    | gi 29377345               | 112          | 1                                       | 17549        | 4.2           |  |
| 29                         | 909.2                                      | 2596.6                                               | 0.020                | 2.9                        | Transcription antitermination protein NusG                | gi 29377206               | 434          | 3                                       | 20413        | 4.8           |  |
| 30                         | 651.8                                      | 1726.7                                               | 0.061                | 2.6                        | 3-oxoacyl-ACP synthase                                    | gi 29374922               | 269          | 3                                       | 43169        | 5.1           |  |
| 31                         | 2124.2                                     | 6150.5                                               | <0.001               | 2.9                        | ATP-dependent Clp protease proteolytic subunit            | gi 29375364               | 420          | 4                                       | 21608        | 4.6           |  |
| 33                         | 322.2                                      | 1646.2                                               | 0.053                | 5.1                        | MTA/SAH nucleosidase                                      | gi 29377174               | 593          | 5                                       | 24633        | 4.9           |  |
| 35                         | 520.3                                      | 2949.0                                               | 0.027                | 5.7                        | Hypoxanthine-guanine phosphoribosyltransferase            | gi 29374905               | 616          | 5                                       | 20260        | 4.7           |  |
| 36                         | 834.6                                      | 2790.7                                               | 0.029                | 3.3                        | Uracil phosphoribosyltransferase                          | gi 29377038               | 367          | 4                                       | 22870        | 5.3           |  |
| 37                         | 485.7                                      | 2630.4                                               | 0.032                | 5.4                        | dTDP-4-dehydrorhamnose 3,5 - epimerase                    | gi 29376701               | 540          | 5                                       | 21323        | 5.4           |  |
| 38                         | 352.7                                      | 2128.1                                               | 0.001                | 6.0                        | dTDP-4-dehydrorhamnose reductase                          | gi 29376699               | 483          | 6                                       | 33773        | 4.7           |  |
| 40                         | 262.0                                      | 1385.0                                               | <0.001               | 5.3                        | Naphthoate synthase                                       | gi 29375076               | 266          | 3                                       | 29847        | 5.2           |  |
| 41                         | 423.8                                      | 2916.0                                               | 0.007                | 6.9                        | ATP-dependent protease peptidase subunit                  | gi 29376201               | 240          | 2                                       | 19700        | 4.9           |  |
| 42                         | 68.0                                       | 3805.6                                               | 0.019                | 55.9                       | Hypothetical protein EF1753                               | gi 29376302               | 656          | 7                                       | 59558        | 4.7           |  |
| 43                         | 357.9                                      | 3445.1                                               | 0.001                | 9.6                        | ABC transporter ATP-binding protein                       | gi 29376561               | 423          | 4                                       | 27612        | 4.9           |  |
| 44                         | 134.5                                      | 4480.4                                               | 0.002                | 33.3                       | Hypothetical protein EF1753                               | gi 29376302               | 454          | 5                                       | 59558        | 4.7           |  |

|                         |         |        |       |      |                                                |    |          |     |   |       |     |
|-------------------------|---------|--------|-------|------|------------------------------------------------|----|----------|-----|---|-------|-----|
| 47                      | 498.6   | 1072.7 | 0.039 | 2.2  | Chaperonin, 33 kDa                             | gi | 29374907 | 795 | 8 | 32261 | 4.7 |
| 48                      | 640.4   | 1332.1 | 0.050 | 2.1  | HAD superfamily hydrolase                      | gi | 29375718 | 400 | 4 | 30053 | 4.9 |
| 49                      | 782.5   | 1966.5 | 0.022 | 2.5  | Hypothetical protein EF1402                    | gi | 29375969 | 462 | 5 | 16970 | 6.0 |
| 50                      | 562.8   | 1472.4 | 0.019 | 2.6  | Threonine synthase                             | gi | 29376915 | 757 | 7 | 37139 | 5.5 |
| 51                      | 442.4   | 1584.0 | 0.016 | 3.6  | Metallo-beta-lactamase superfamily protein     | gi | 29376926 | 278 | 2 | 23172 | 5.1 |
| 52                      | 52.3    | 797.7  | 0.017 | 15.2 | Cobyric acid synthase                          | gi | 29377073 | 224 | 2 | 25821 | 4.9 |
| 53                      | 156.9   | 627.6  | 0.019 | 4.0  | Cro/CI family transcriptional regulator        | gi | 29377418 | 163 | 2 | 36988 | 5.1 |
| Down-regulated proteins |         |        |       |      |                                                |    |          |     |   |       |     |
| 2                       | 9248.1  | 1517.9 | 0.012 | 0.2  | Hypothetical protein EF2923                    | gi | 29377387 | 343 | 3 | 8531  | 4.6 |
| 4                       | 3521.5  | 352.4  | 0.076 | 0.1  | Fumarate reductase flavoprotein subunit        | gi | 29377044 | 833 | 7 | 53781 | 5.3 |
| 5                       | 12048.4 | 3091.1 | 0.018 | 0.3  | 30S ribosomal protein S6                       | gi | 29374668 | 196 | 2 | 11598 | 5.0 |
| 6                       | 21379.7 | 7394.6 | 0.028 | 0.3  | Phosphocarrier protein HPr                     | gi | 29375306 | 94  | 1 | 9315  | 4.9 |
| 7                       | 21695.5 | 6762.8 | 0.053 | 0.3  | 50S ribosomal protein L31                      | gi | 29375747 | 227 | 2 | 10119 | 5.6 |
| 8                       | 8903.0  | 1581.2 | 0.082 | 0.2  | 50S ribosomal protein L7/L12                   | gi | 29377194 | 787 | 5 | 12389 | 4.5 |
| 9                       | 1547.1  | 600.7  | 0.090 | 0.4  | Phosphopentomutase                             | gi | 29374833 | 403 | 4 | 42773 | 4.9 |
| 10                      | 1134.6  | 589.4  | 0.033 | 0.5  | Ribulose-phosphate 3-epimerase                 | gi | 29377574 | 440 | 3 | 23661 | 4.7 |
| 12                      | 3004.3  | 1680.5 | 0.058 | 0.6  | Amino acid ABC transporter ATP-binding protein | gi | 29375353 | 192 | 2 | 26906 | 4.8 |
| 13                      | 1376.6  | 795.8  | 0.090 | 0.6  | Pheromone cAD1 lipoprotein                     | gi | 29377699 | 262 | 3 | 33122 | 5.3 |
| 14                      | 2588.7  | 1610.9 | 0.034 | 0.6  | 3-oxoacyl-ACP synthase                         | gi | 29377346 | 839 | 7 | 43043 | 5.1 |

<sup>a</sup> spot numbers as given in supplementary Figure S1

<sup>b</sup> represents the average spot quantity for three control biological replicates .

<sup>c</sup> represents the average spot quantity for three bacitracin-stressed biological replicates.

<sup>d</sup> represents the probability associated with Student's t-test (two tailed and paired) tested between the 3 control samples and 3 bacitracin stressed samples.

<sup>e</sup> represents the x-fold change in spot quantity between the bacitracin stressed and the control samples.

<sup>f</sup> Proteins with one peptide match were manually confirmed by the Centre for Protein Research, University of Otago.

Note that spots number 25, 32, 34, 39 and 46 with increased and spots number 1, 3, 11 and 45 with decreased quantity had no significant protein hits in MASCOT (Matrix Science) analysis and thus are not included in this table.

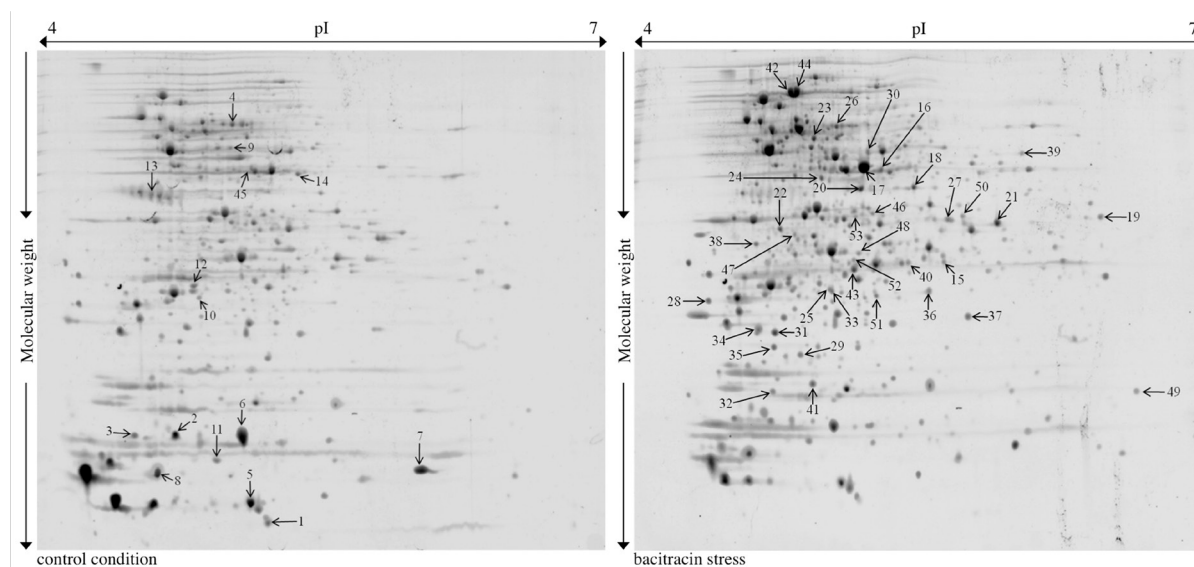

**FIG S1** Proteomic analysis of the bacitracin stress response of *E. faecalis* V583. Protein extracts of untreated cells (left gel) or cells treated with  $64 \mu\text{g ml}^{-1}$  bacitracin (right gel) were separated in the first dimension by isoelectric focusing on an 18 cm pH 4-7 ReadyStrip<sup>TM</sup> IPG strip (Bio-Rad) and in the second dimension by SDS-PAGE (12.5 % acrylamide). Proteins were stained with SYPRO-Ruby (Invitrogen) and the gel image was acquired using a Molecular Imager FX (Bio-Rad). On the left gel, protein spots with decreased intensity after bacitracin exposure are labelled, on the right gel, protein spots with increased intensity. Detailed information on spot identification is given in supplementary Table S4 and a summary in Table S3, using the same spot numbering as shown in this figure.

## References

1. **Thurlow LR, Thomas VC, Hancock LE.** 2009. Capsular polysaccharide production in *Enterococcus faecalis* and contribution of CpsF to capsule serospecificity. *J. Bacteriol.* **191**:6203–6210.
2. **Poyart C, Trieu-Cuot P.** 1997. A broad-host-range mobilizable shuttle vector for the construction of transcriptional fusions to beta-galactosidase in gram-positive bacteria. *FEMS Microbiol. Lett.* **156**:193–198.
3. **Trieu-Cuot P, Carlier C, Poyart-Salmeron C, Courvalin P.** 1990. A pair of mobilizable shuttle vectors conferring resistance to spectinomycin for molecular cloning in *Escherichia coli* and in gram-positive bacteria. *Nucleic Acids Res.* **18**:4296.
4. **Schmalisch M, Maiques E, Nikolov L, Camp AH, Chevreux B, Muffler A, Rodriguez S, Perkins J, Losick R.** 2010. Small genes under sporulation control in the *Bacillus subtilis* genome. *J. Bacteriol.* **192**:5402–5412.
5. **Radeck J, Kraft K, Bartels J, Cikovic T, Dürr F, Emenegger J, Kelterborn S, Sauer C, Fritz G, Gebhard S, Mascher T.** 2013 The *Bacillus* BioBrick box: generation and evaluation of essential genetic building blocks for standardized work with *Bacillus subtilis*. *J. Biol. Eng.* in press.
6. **Derré I, Rapoport G, Msadek T.** 2000. The CtsR regulator of stress response is active as a dimer and specifically degraded *in vivo* at 37 degrees C. *Mol. Microbiol.* **38**:335–347.
7. **Kallenberg F, Dintner S, Schmitz R, Gebhard S.** 2013. Identification of regions important for resistance and signalling within the antimicrobial peptide transporter BceAB of *Bacillus subtilis*. *J. Bacteriol.* **195**:3287–3297.
8. **Grant SG, Jessee J, Bloom FR, Hanahan D.** 1990. Differential plasmid rescue from transgenic mouse DNAs into *Escherichia coli* methylation-restriction mutants. *Proc. Natl. Acad. Sci. U.S.A.* **87**:4645–4649.
9. **Casadaban MJ, Cohen SN.** 1980. Analysis of gene control signals by DNA fusion and cloning in *Escherichia coli*. *J. Mol. Biol.* **138**:179–207.
10. **Jacob AE, Hobbs SJ.** 1974. Conjugal transfer of plasmid-borne multiple antibiotic resistance in *Streptococcus faecalis* var. *zymogenes*. *J. Bacteriol.* **117**:360–372.
11. **Sahm DF, Kissinger J, Gilmore MS, Murray PR, Mulder R, Solliday J, Clarke B.** 1989. *In vitro* susceptibility studies of vancomycin-resistant *Enterococcus faecalis*. *Antimicrob. Agents Chemother.* **33**:1588–1591.
12. **Laemmli UK.** 1970. Cleavage of structural proteins during the assembly of the head of bacteriophage T4. *Nature* **227**:680–685.
13. **Candiano G, Bruschi M, Musante L, Santucci L, Ghiggeri GM, Carnemolla B, Orecchia P, Zardi L, Righetti PG.** 2004. Blue silver: a very sensitive colloidal Coomassie G-250 staining for proteome analysis. *Electrophoresis* **25**:1327–1333.
14. **Teng F, Singh KV, Bourgogne A, Zeng J, Murray BE.** 2009. Further characterization of the *epa* gene cluster and Epa polysaccharides of *Enterococcus faecalis*. *Infection and Immunity* **77**:3759–3767.
15. **Bouhss A, Trunkfield AE, Bugg TDH, Mengin-Lecreulx D.** 2008. The biosynthesis of peptidoglycan lipid-linked intermediates. *FEMS Microbiology Reviews* **32**:208–233.
16. **Storm DR, Strominger JL.** 1973. Complex formation between bacitracin peptides and isoprenyl pyrophosphates. The specificity of lipid-peptide interactions. *J. Biol. Chem.* **248**:3940–3945.
17. **Huang X, Gaballa A, Cao M, Helmann JD.** 1999. Identification of target promoters for the *Bacillus subtilis* extracytoplasmic function sigma factor, sigma W. *Mol. Microbiol.* **31**:361–371.
18. **Mascher T, Hachmann AB, Helmann JD.** 2007. Regulatory overlap and functional redundancy among *Bacillus subtilis* extracytoplasmic function sigma factors. *J. Bacteriol.* **189**:6919–6927.
19. **Blanche F, Couder M, Debussche L, Thibaut D, Cameron B, Crouzet J.** 1991. Biosynthesis of vitamin B12: stepwise amidation of carboxyl groups b, d, e, and g of cobyrinic acid a,c-diamide is catalyzed by one enzyme in *Pseudomonas denitrificans*. *J. Bacteriol.* **173**:6046–6051.
20. **Dintner S, Staroń A, Berchtold E, Petri T, Mascher T, Gebhard S.** 2011. Coevolution of ABC transporters and two-component regulatory systems as resistance modules against antimicrobial peptides in Firmicutes Bacteria. *J. Bacteriol.* **193**:3851–3862.
21. **Gebhard S.** 2012. ABC transporters of antimicrobial peptides in Firmicutes bacteria - phylogeny, function and regulation. *Mol. Microbiol.* **86**:1295–1317.
22. **Abranches J, Tijerina P, Avilés-Reyes A, Gaca AO, Kajfasz JK, Lemos JA.** 2013. The cell wall-targeting antibiotic stimulon of *Enterococcus faecalis*. *PLoS ONE* **8**:e64875.
23. **Breukink E, de Kruijff B.** 2006. Lipid II as a target for antibiotics. *Nat. Rev. Drug Discov.* **5**:321–323.
24. **Cotter PD, Hill C, Ross RP.** 2005. Bacteriocins: developing innate immunity for food. *Nat. Rev.*

- Microbiol. **3**:777–788.
25. **Peschel A, Otto M, Jack RW, Kalbacher H, Jung G, Gotz F.** 1999. Inactivation of the *dlt* operon in *Staphylococcus aureus* confers sensitivity to defensins, protegrins, and other antimicrobial peptides. *J. Biol. Chem.* **274**:8405–8410.
  26. **McBride SM, Sonenshein AL.** 2011. The *dlt* operon confers resistance to cationic antimicrobial peptides in *Clostridium difficile*. *Microbiology* **157**:1457–1465.
  27. **Reichmann NT, Picarra Cassona C, Grundling A.** 2013. Revised mechanism of D-alanine incorporation into cell wall polymers in Gram-positive bacteria. *Microbiology*.
